# Supplementary material for: Outcome of giant pituitary tumors requiring surgery
Source: PubMed Central journal article supplement (PMC9465329; doi:10.3389/fendo.2022.975560), 2022-08-29
Supplement: DataSheet_1.pdf [file DataSheet_1.pdf]

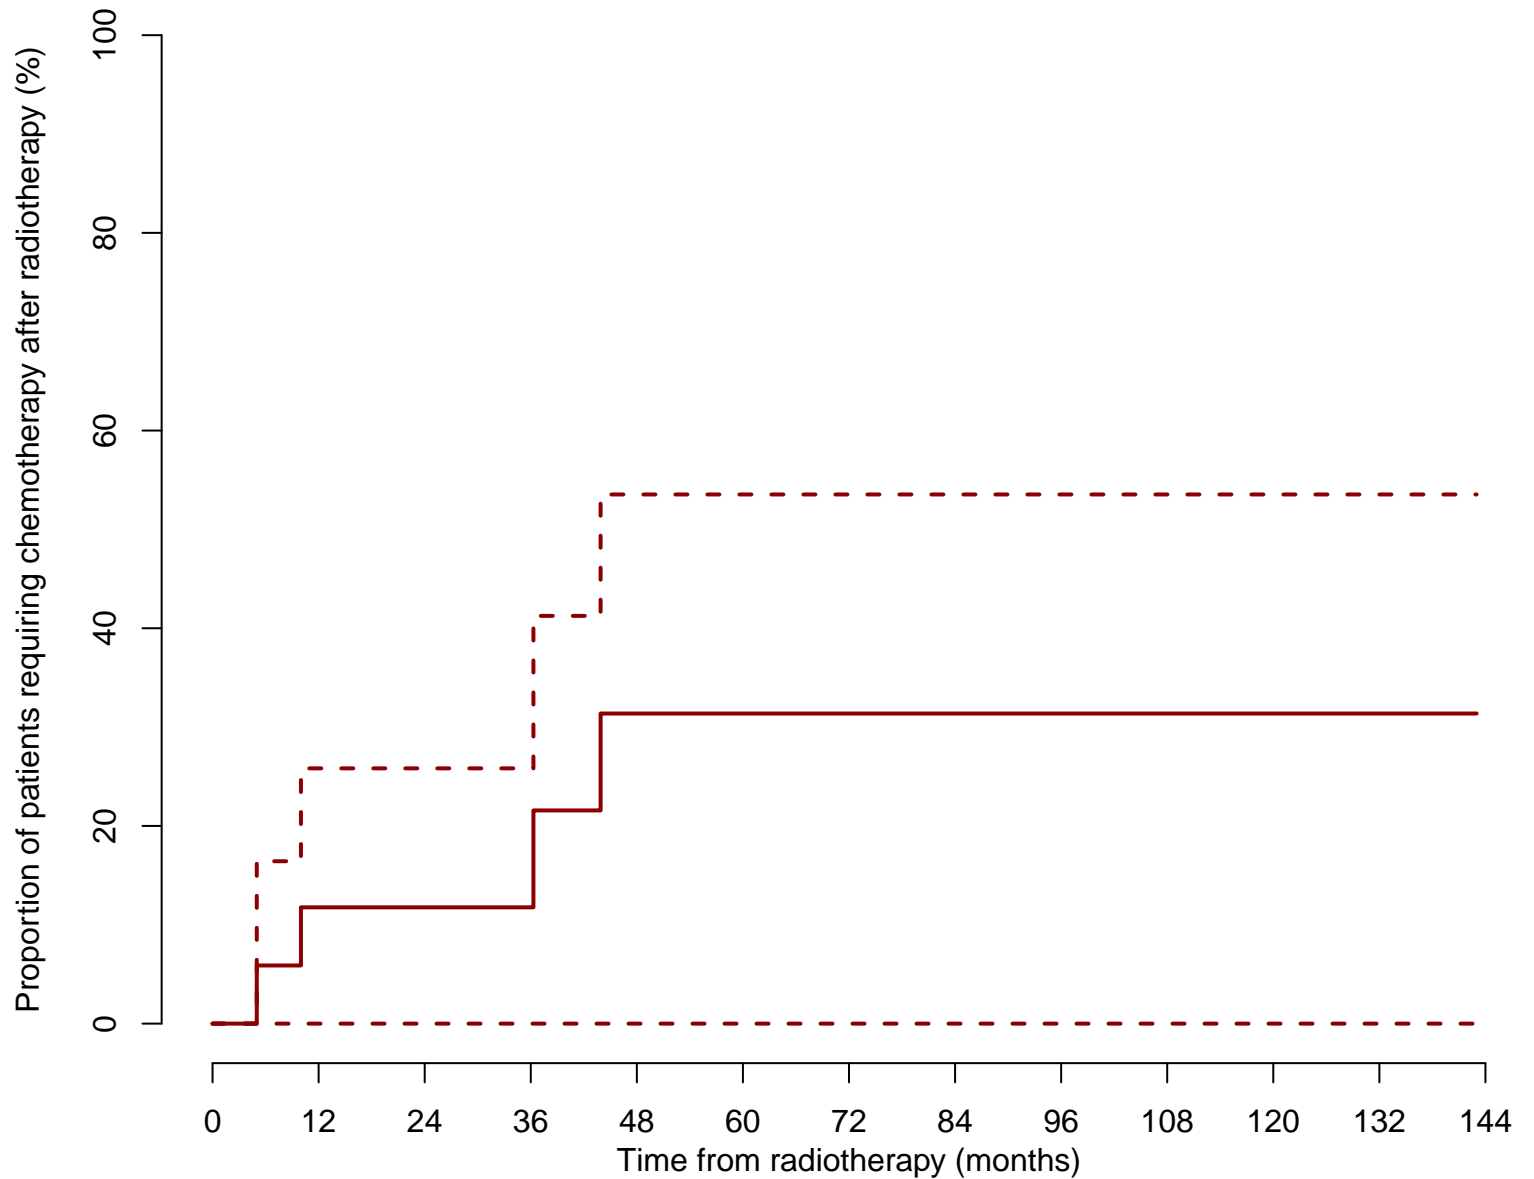

No. At Risk

18 15 9 9 7 5 3 2 2 2 1 1 0
